# Supplementary material for: Incidence of HIV-positive admission and inpatient mortality in Malawi (2012-2019): a population cohort study
Source: PubMed Central journal article supplement (PMC7611991; doi:10.1097/qad.0000000000003006), 2021-11-01
Supplement: EMS129346-supplement-Supplementary_appendix.pdf [file EMS129346-supplement-Supplementary_appendix.pdf]

**Supplementary Figure 1: Admissions by age, sex, HIV and quarter-year**

S. Figure 1A: Absolute numbers of admissions, stacked bar chart of crude data.

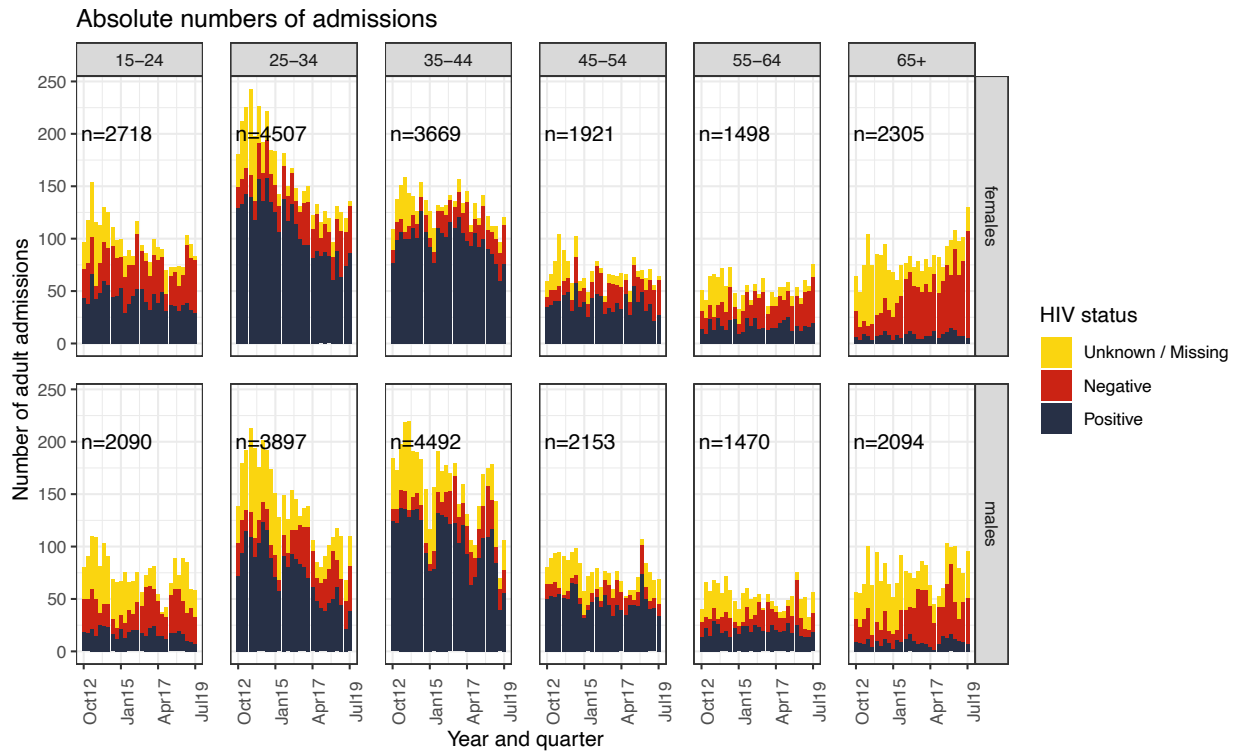

S. Figure 1B: Population level incidence of admissions, stacked bar chart of crude data.

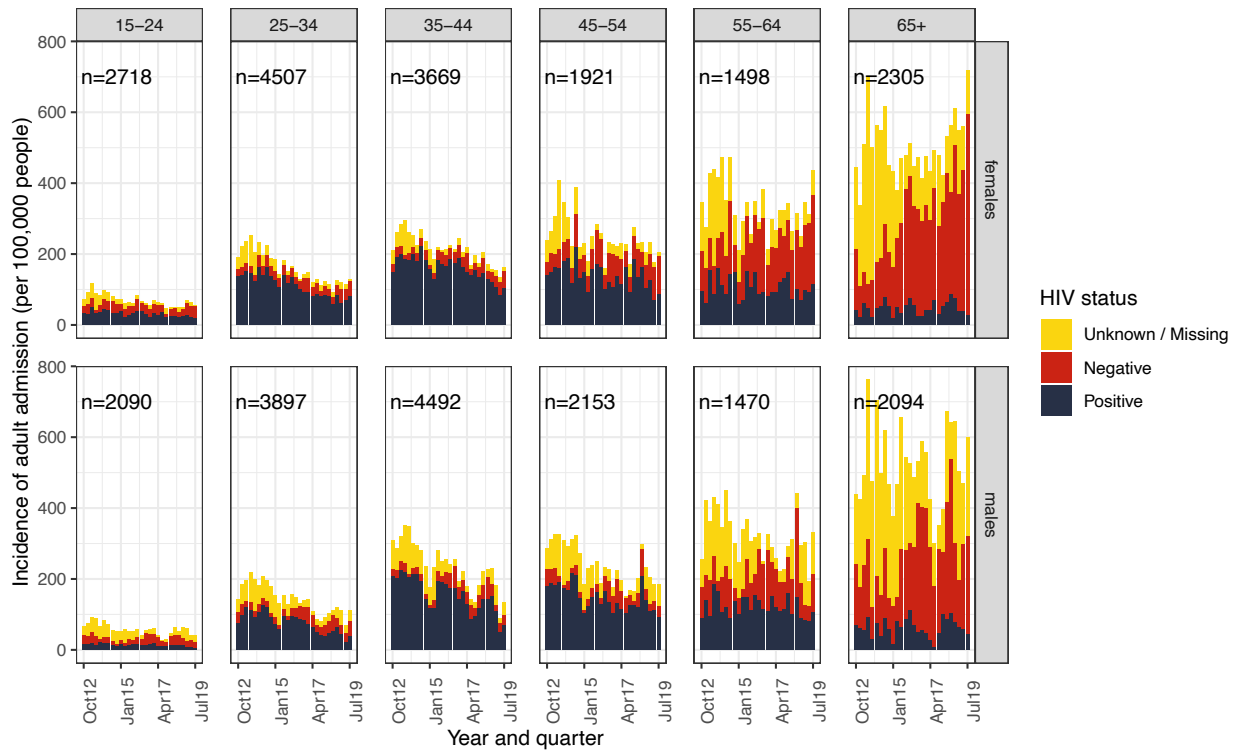

### Supplementary table 1: Blantyre census for 2008 and 2018

S Table 1A: Measured population Blantyre (includes Blantyre City and Blantyre Rural administrative districts) at 2008 and 2018 census

| ageg10 | sex     | 2008-04-01 | 2018-04-01 |
|--------|---------|------------|------------|
| 15-24  | females | 115573     | 146543     |
| 15-24  | males   | 103290     | 138639     |
| 25-34  | females | 86762      | 104200     |
| 25-34  | males   | 96314      | 97602      |
| 35-44  | females | 36968      | 69311      |
| 35-44  | males   | 46176      | 76067      |
| 45-54  | females | 20676      | 29912      |
| 45-54  | males   | 22000      | 35461      |
| 55-64  | females | 12915      | 16974      |
| 55-64  | males   | 14529      | 16887      |
| 65+    | females | 11962      | 17441      |
| 65+    | males   | 10728      | 15286      |

S Table 1B: Population Blantyre at start (Q4.2012) and end (Q3.2019) study period [calculated using linear interpolation and extrapolation]

| ageg10 | sex     | 2012-10-01 | 2019-07-01 | change |
|--------|---------|------------|------------|--------|
| 15-24  | females | 129510     | 150378     | 14%    |
| 15-24  | males   | 119197     | 143016     | 17%    |
| 25-34  | females | 94609      | 106359     | 11%    |
| 25-34  | males   | 96894      | 97762      | 1%     |
| 35-44  | females | 51523      | 73319      | 30%    |
| 35-44  | males   | 59627      | 79772      | 25%    |
| 45-54  | females | 24832      | 31058      | 20%    |
| 45-54  | males   | 28058      | 37129      | 24%    |
| 55-64  | females | 14743      | 17476      | 16%    |
| 55-64  | males   | 15591      | 17180      | 9%     |
| 65+    | females | 14427      | 18121      | 20%    |
| 65+    | males   | 12778      | 15851      | 19%    |

**Supplementary figure 2: Sensitivity analysis for incidence (imputation)**

S. Figure 2A: Everyone with HIV status unknown / missing is treated as if HIV negative

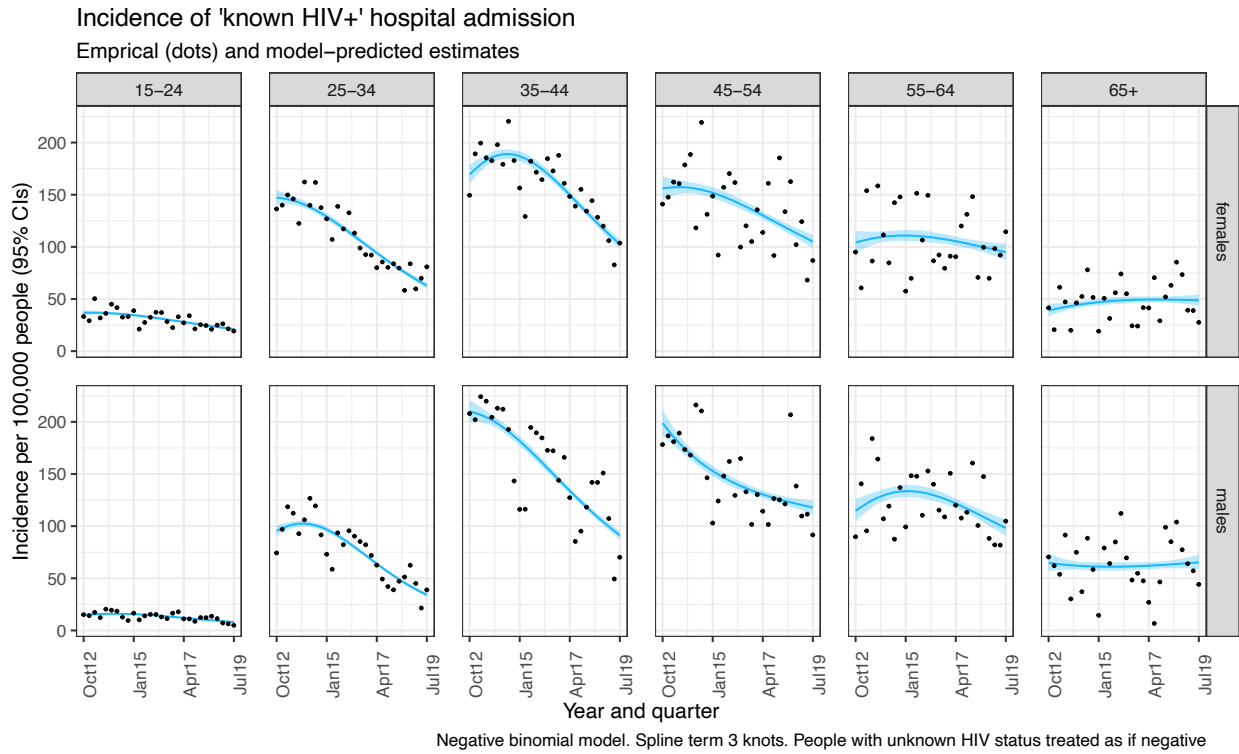

S. Figure 2B: Everyone with HIV status unknown / missing is treated as if HIV positive

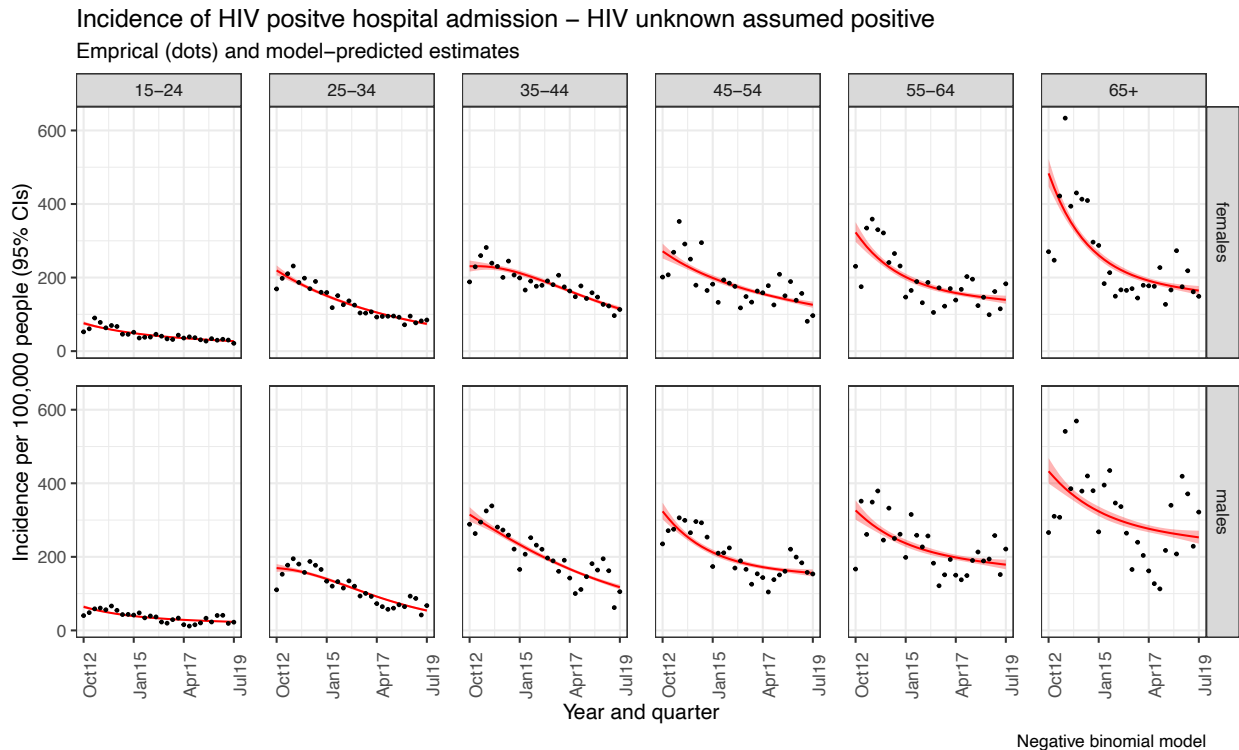

## Supplementary Table 2: Reduction in admission to QECH by age group and sex

| Age group | Sex     | HIV status imputed when missing |                        | HIV unknowns assumed negative |                           | HIV unknowns assumed positive |                        |
|-----------|---------|---------------------------------|------------------------|-------------------------------|---------------------------|-------------------------------|------------------------|
|           |         | Absolute number                 | Relative decline       | Absolute number               | Relative decline          | Absolute number               | Relative decline       |
| 15-24     | females | 815 (612 to 1019)               | 0.356 (0.299 to 0.414) | 253 (164 to 342)              | 0.175 (0.125 to 0.226)    | 1248 (1049 to 1447)           | 0.42 (0.381 to 0.459)  |
| 15-24     | males   | 599 (417 to 782)                | 0.398 (0.325 to 0.472) | 66 (19 to 113)                | 0.121 (0.045 to 0.198)    | 1039 (879 to 1198)            | 0.441 (0.403 to 0.479) |
| 25-34     | females | 2264 (1940 to 2589)             | 0.388 (0.354 to 0.422) | 1078 (873 to 1283)            | 0.26 (0.223 to 0.297)     | 2474 (2096 to 2851)           | 0.401 (0.364 to 0.437) |
| 25-34     | males   | 1330 (1065 to 1595)             | 0.314 (0.271 to 0.357) | 530 (392 to 669)              | 0.204 (0.161 to 0.246)    | 1489 (1194 to 1784)           | 0.322 (0.279 to 0.366) |
| 35-44     | females | 844 (609 to 1080)               | 0.215 (0.168 to 0.262) | 223 (61 to 385)               | 0.075 (0.025 to 0.126)    | 895 (632 to 1157)             | 0.222 (0.171 to 0.273) |
| 35-44     | males   | 2169 (1828 to 2509)             | 0.366 (0.329 to 0.402) | 1121 (911 to 1331)            | 0.274 (0.236 to 0.311)    | 2255 (1877 to 2633)           | 0.367 (0.328 to 0.406) |
| 45-54     | females | 635 (481 to 790)                | 0.322 (0.269 to 0.375) | 149 (59 to 239)               | 0.122 (0.058 to 0.187)    | 713 (559 to 866)              | 0.336 (0.287 to 0.384) |
| 45-54     | males   | 1025 (836 to 1213)              | 0.372 (0.329 to 0.415) | 497 (381 to 614)              | 0.274 (0.227 to 0.321)    | 1119 (909 to 1329)            | 0.379 (0.334 to 0.423) |
| 55-64     | females | 337 (178 to 497)                | 0.33 (0.226 to 0.435)  | -6 (-55 to 43)                | -0.013 (-0.119 to 0.094)  | 595 (476 to 714)              | 0.409 (0.36 to 0.457)  |
| 55-64     | males   | 267 (114 to 420)                | 0.246 (0.139 to 0.353) | -30 (-82 to 21)               | -0.058 (-0.162 to 0.047)  | 461 (338 to 583)              | 0.308 (0.251 to 0.364) |
| 65+       | females | 308 (156 to 459)                | 0.421 (0.297 to 0.544) | -37 (-65 to -8)               | -0.207 (-0.398 to -0.016) | 1081 (911 to 1252)            | 0.491 (0.451 to 0.531) |
| 65+       | males   | 225 (102 to 348)                | 0.319 (0.2 to 0.438)   | 9 (-26 to 43)                 | 0.033 (-0.096 to 0.162)   | 498 (366 to 630)              | 0.287 (0.233 to 0.341) |

Supplementary figure 3A: Sensitivity analysis for incidence (choice of model)

S. Figure 3A: Negative binomial distribution without spline terms

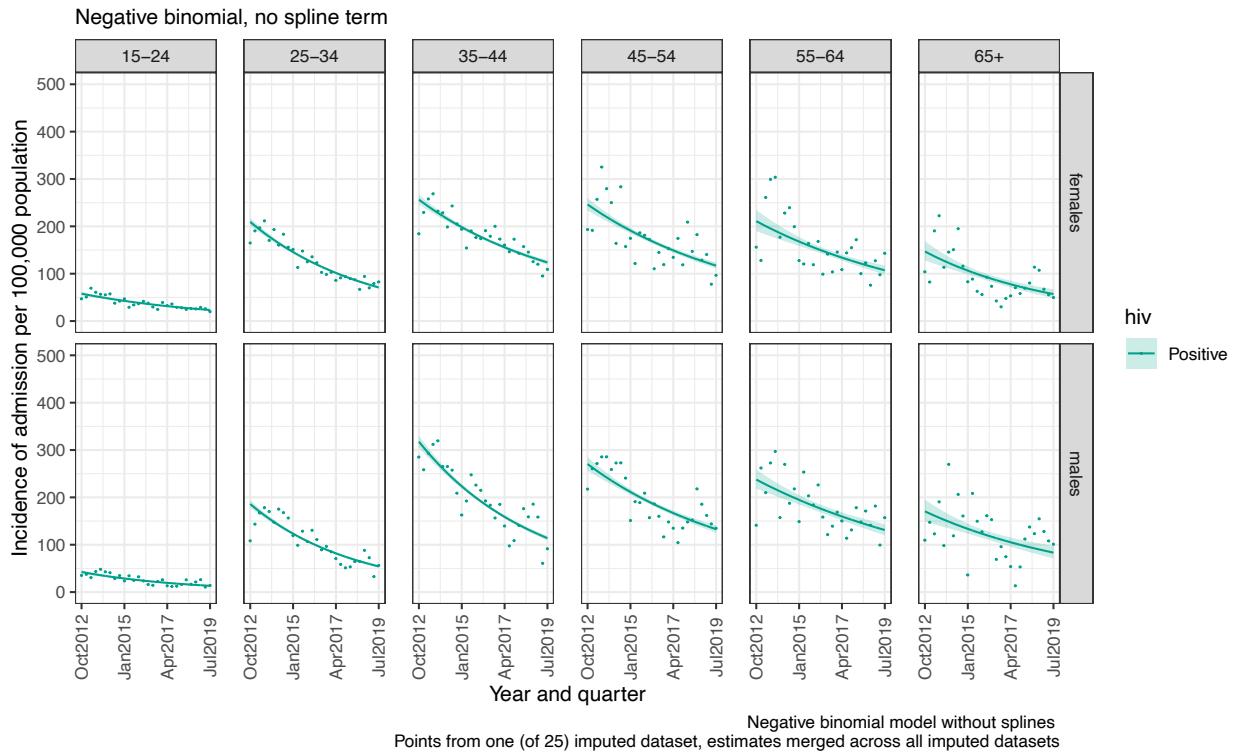

S. Figure 3B: Negative binomial distribution with 5 knots in spline

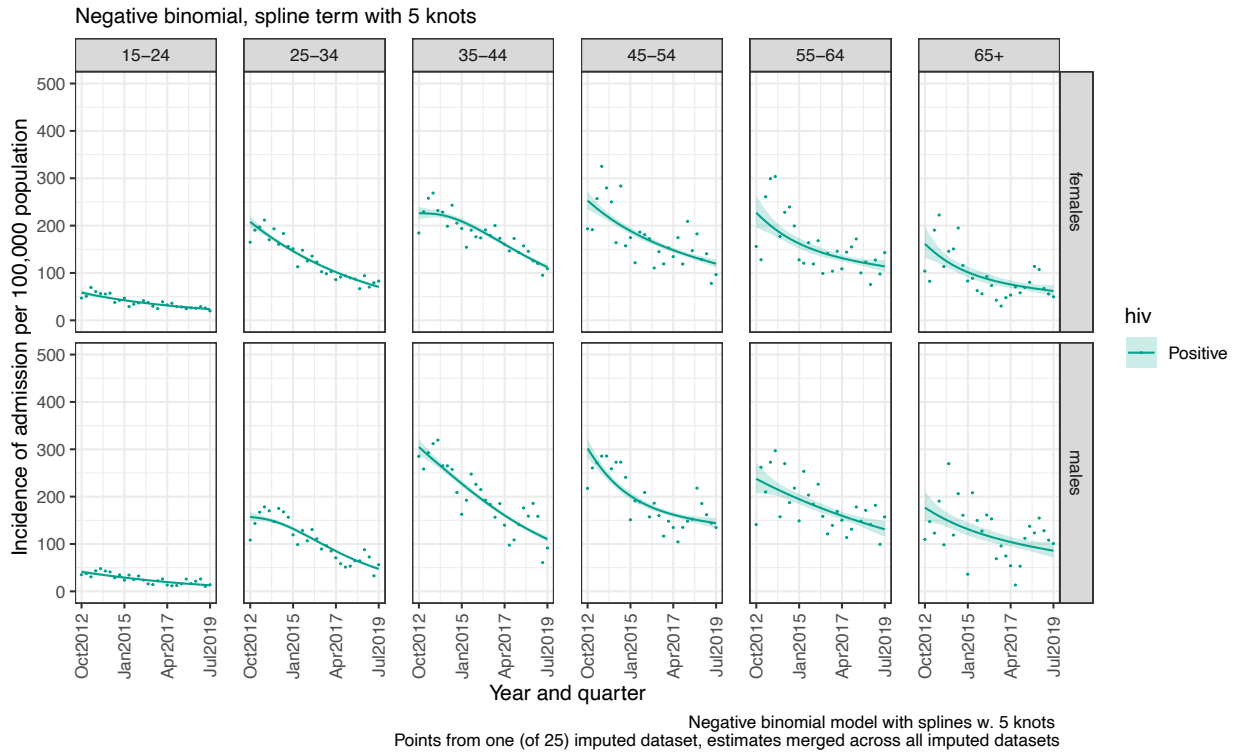

S. Figure 3C: Poisson distribution, 3 knot splines

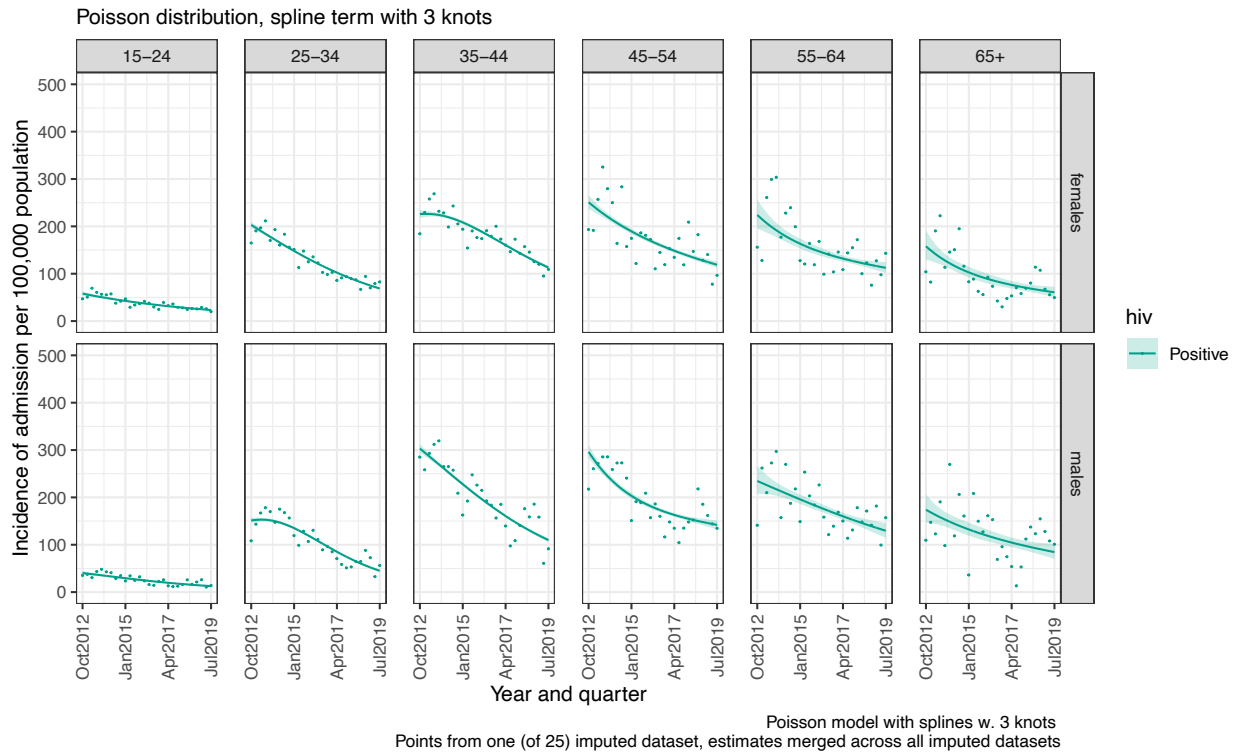

S. Figure 3D: Gamma distribution, no splines

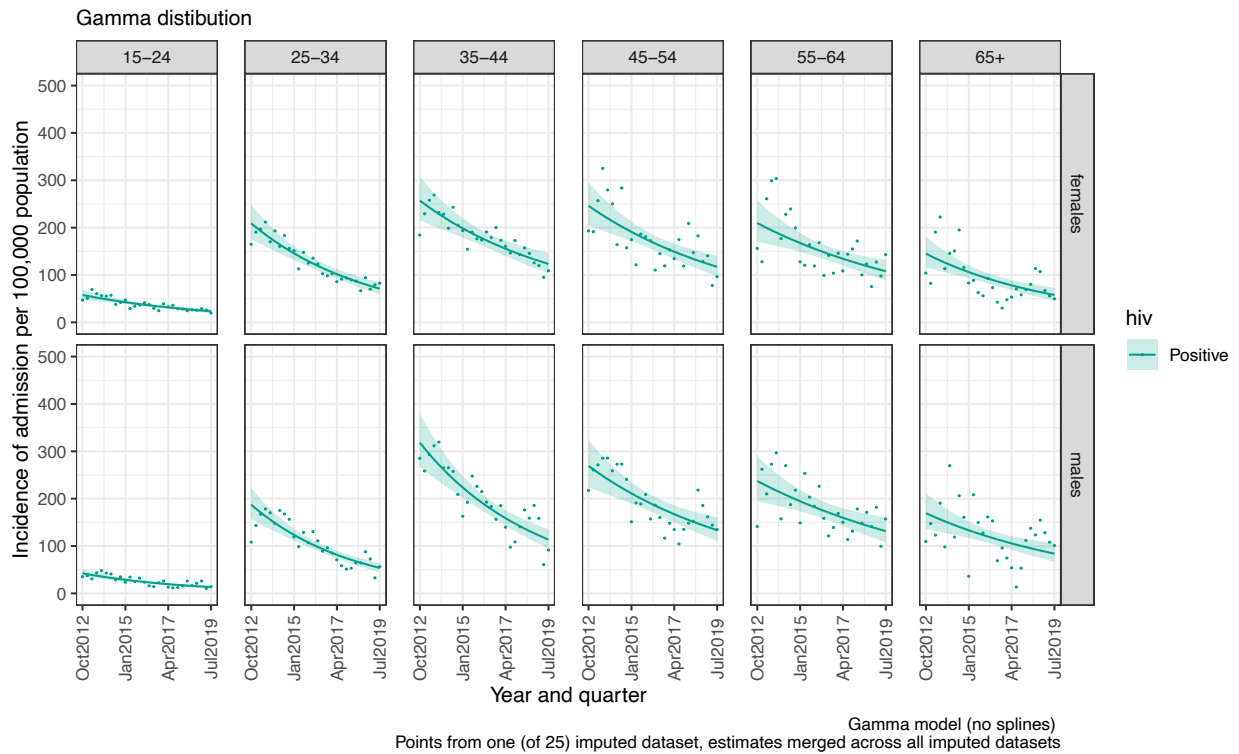

Supplementary table 3: Death risk by age group and sex

Table 3A: Crude Data

| hivart                           |               | (Missing) (N=2687) | Died (N=6071) | Discharged alive (N=24056) |
|----------------------------------|---------------|--------------------|---------------|----------------------------|
| HIV negative                     | <b>ageg10</b> |                    |               |                            |
|                                  | 15-24         | 73 (4.1%)          | 124 (7.0%)    | 1575 (88.9%)               |
|                                  | 25-34         | 66 (4.2%)          | 135 (8.6%)    | 1366 (87.2%)               |
|                                  | 35-44         | 96 (8.5%)          | 123 (10.9%)   | 909 (80.6%)                |
|                                  | 45-54         | 79 (9.5%)          | 104 (12.6%)   | 645 (77.9%)                |
|                                  | 55-64         | 119 (11.1%)        | 143 (13.4%)   | 809 (75.5%)                |
|                                  | 65+           | 258 (12.6%)        | 323 (15.8%)   | 1463 (71.6%)               |
|                                  | <b>sex</b>    |                    |               |                            |
|                                  | females       | 403 (8.6%)         | 448 (9.6%)    | 3814 (81.8%)               |
|                                  | males         | 288 (7.7%)         | 504 (13.5%)   | 2953 (78.9%)               |
| HIV positive, ART status unknown | <b>ageg10</b> |                    |               |                            |
|                                  | 15-24         | 3 (15.8%)          | 2 (10.5%)     | 14 (73.7%)                 |
|                                  | 25-34         | 22 (22.9%)         | 18 (18.8%)    | 56 (58.3%)                 |
|                                  | 35-44         | 20 (19.6%)         | 16 (15.7%)    | 66 (64.7%)                 |
|                                  | 45-54         | 3 (8.3%)           | 6 (16.7%)     | 27 (75.0%)                 |
|                                  | 55-64         | 6 (30.0%)          | 7 (35.0%)     | 7 (35.0%)                  |
|                                  | 65+           | 0 (0.0%)           | 4 (36.4%)     | 7 (63.6%)                  |
|                                  | <b>sex</b>    |                    |               |                            |
|                                  | females       | 24 (20.2%)         | 19 (16.0%)    | 76 (63.9%)                 |
|                                  | males         | 30 (18.2%)         | 34 (20.6%)    | 101 (61.2%)                |
| HIV positive, not on ART         | <b>ageg10</b> |                    |               |                            |
|                                  | 15-24         | 15 (4.0%)          | 73 (19.4%)    | 288 (76.6%)                |
|                                  | 25-34         | 115 (10.8%)        | 168 (15.8%)   | 783 (73.5%)                |
|                                  | 35-44         | 110 (11.0%)        | 179 (17.9%)   | 712 (71.1%)                |
|                                  | 45-54         | 32 (8.5%)          | 87 (23.2%)    | 256 (68.3%)                |
|                                  | 55-64         | 11 (7.1%)          | 31 (19.9%)    | 114 (73.1%)                |
|                                  | 65+           | 9 (11.8%)          | 20 (26.3%)    | 47 (61.8%)                 |
|                                  | <b>sex</b>    |                    |               |                            |
|                                  | females       | 123 (9.0%)         | 195 (14.2%)   | 1055 (76.8%)               |
|                                  | males         | 169 (10.1%)        | 363 (21.6%)   | 1145 (68.3%)               |
| HIV positive, on ART             | <b>ageg10</b> |                    |               |                            |
|                                  | 15-24         | 138 (10.8%)        | 184 (14.5%)   | 951 (74.7%)                |
|                                  | 25-34         | 389 (9.8%)         | 748 (18.8%)   | 2838 (71.4%)               |
|                                  | 35-44         | 487 (10.6%)        | 965 (20.9%)   | 3160 (68.5%)               |
|                                  | 45-54         | 202 (10.2%)        | 430 (21.7%)   | 1346 (68.0%)               |
|                                  | 55-64         | 82 (9.6%)          | 230 (26.8%)   | 545 (63.6%)                |
|                                  | 65+           | 41 (10.8%)         | 108 (28.5%)   | 230 (60.7%)                |
|                                  | <b>sex</b>    |                    |               |                            |
|                                  | females       | 739 (10.2%)        | 1210 (16.7%)  | 5315 (73.2%)               |
|                                  | males         | 600 (10.3%)        | 1455 (25.0%)  | 3755 (64.6%)               |
| HIV status unknown               | <b>ageg10</b> |                    |               |                            |
|                                  | 15-24         | 29 (2.1%)          | 179 (13.1%)   | 1160 (84.8%)               |
|                                  | 25-34         | 54 (3.2%)          | 328 (19.3%)   | 1318 (77.5%)               |
|                                  | 35-44         | 41 (3.1%)          | 331 (25.1%)   | 946 (71.8%)                |
|                                  | 45-54         | 42 (4.9%)          | 223 (26.0%)   | 592 (69.1%)                |
|                                  | 55-64         | 46 (5.3%)          | 233 (27.0%)   | 585 (67.7%)                |
|                                  | 65+           | 99 (5.2%)          | 549 (29.1%)   | 1241 (65.7%)               |
|                                  | <b>sex</b>    |                    |               |                            |

| hivart  | (Missing) (N=2687) | Died (N=6071) | Discharged alive (N=24056) |
|---------|--------------------|---------------|----------------------------|
| females | 125 (3.9%)         | 641 (20.1%)   | 2431 (76.0%)               |
| males   | 186 (3.9%)         | 1202 (25.0%)  | 3411 (71.1%)               |

Table 3B: After imputation

Table 2: After imputation for missing data

| hivart                                              |               | Died (N=6656) | Discharged alive (N=26158) |
|-----------------------------------------------------|---------------|---------------|----------------------------|
| HIV negative                                        | <b>ageg10</b> |               |                            |
|                                                     | 15-24         | 185 (7.5%)    | 2280 (92.5%)               |
|                                                     | 25-34         | 178 (9.2%)    | 1763 (90.8%)               |
|                                                     | 35-44         | 158 (11.7%)   | 1193 (88.3%)               |
|                                                     | 45-54         | 158 (15.6%)   | 855 (84.4%)                |
|                                                     | 55-64         | 245 (16.6%)   | 1234 (83.4%)               |
|                                                     | 65+           | 784 (22.5%)   | 2707 (77.5%)               |
|                                                     | <b>sex</b>    |               |                            |
|                                                     | females       | 782 (12.8%)   | 5321 (87.2%)               |
|                                                     | males         | 926 (16.4%)   | 4711 (83.6%)               |
| HIV positive by imputation, assume no ART for model | <b>ageg10</b> |               |                            |
|                                                     | 15-24         | 135 (20.0%)   | 540 (80.0%)                |
|                                                     | 25-34         | 299 (22.5%)   | 1027 (77.5%)               |
|                                                     | 35-44         | 312 (28.5%)   | 783 (71.5%)                |
|                                                     | 45-54         | 190 (28.3%)   | 482 (71.7%)                |
|                                                     | 55-64         | 157 (34.4%)   | 299 (65.6%)                |
|                                                     | 65+           | 185 (41.9%)   | 257 (58.1%)                |
|                                                     | <b>sex</b>    |               |                            |
|                                                     | females       | 408 (23.2%)   | 1351 (76.8%)               |
|                                                     | males         | 870 (29.9%)   | 2037 (70.1%)               |
| HIV positive, not on ART                            | <b>ageg10</b> |               |                            |
|                                                     | 15-24         | 75 (19.8%)    | 303 (80.2%)                |
|                                                     | 25-34         | 198 (18.1%)   | 898 (81.9%)                |
|                                                     | 35-44         | 213 (20.7%)   | 816 (79.3%)                |
|                                                     | 45-54         | 95 (25.0%)    | 285 (75.0%)                |
|                                                     | 55-64         | 33 (20.9%)    | 125 (79.1%)                |
|                                                     | 65+           | 25 (32.1%)    | 53 (67.9%)                 |
|                                                     | <b>sex</b>    |               |                            |
|                                                     | females       | 227 (16.2%)   | 1174 (83.8%)               |
|                                                     | males         | 412 (24.0%)   | 1306 (76.0%)               |
| HIV positive, on ART                                | <b>ageg10</b> |               |                            |
|                                                     | 15-24         | 211 (16.4%)   | 1079 (83.6%)               |
|                                                     | 25-34         | 863 (21.4%)   | 3178 (78.6%)               |
|                                                     | 35-44         | 1114 (23.8%)  | 3572 (76.2%)               |
|                                                     | 45-54         | 473 (23.5%)   | 1536 (76.5%)               |
|                                                     | 55-64         | 236 (27.0%)   | 639 (73.0%)                |
|                                                     | 65+           | 134 (34.5%)   | 254 (65.5%)                |
|                                                     | <b>sex</b>    |               |                            |
|                                                     | females       | 1402 (19.1%)  | 5953 (80.9%)               |
|                                                     | males         | 1629 (27.5%)  | 4305 (72.5%)               |



**Supplementary figure 4: Sensitivity analysis risk of death**

Complete case analysis, HIV and outcome unknown status removed

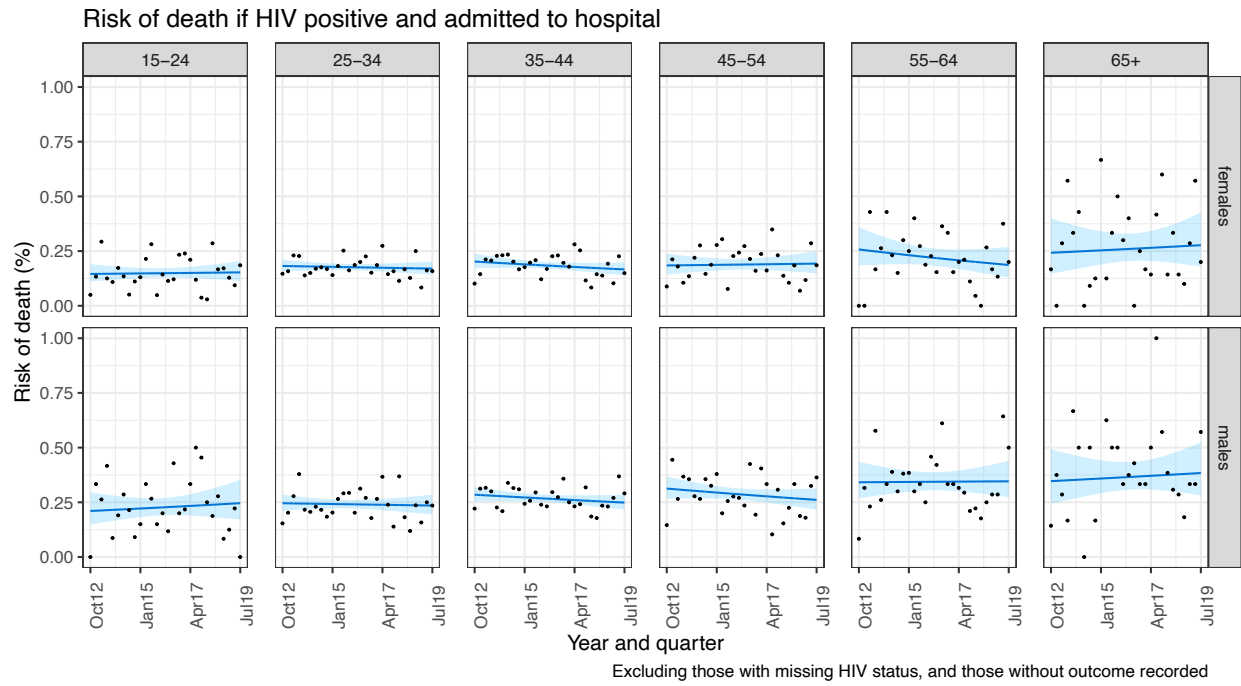

**Supplementary figure 5: Risk of death including ART as a covariate**

Plot model-predicted risk of death from model incorporating age group, sex, quarter-year and ART status

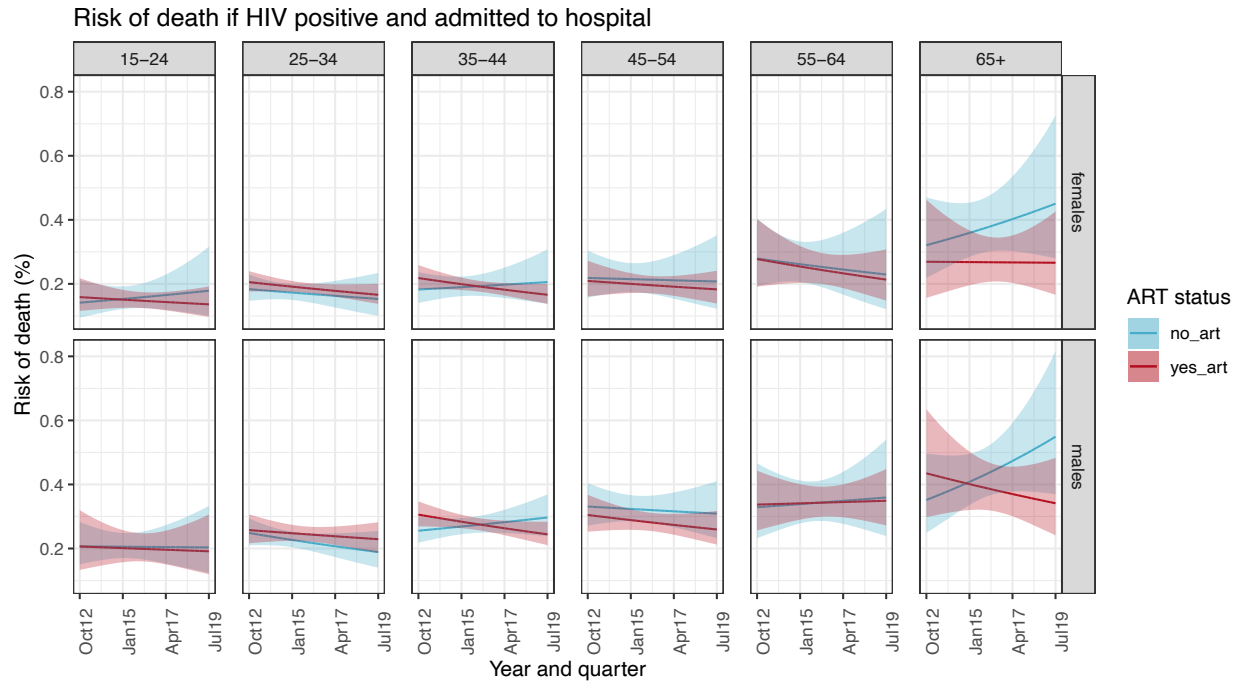

Supplementary figure 6: Risk of death over time including HIV negative

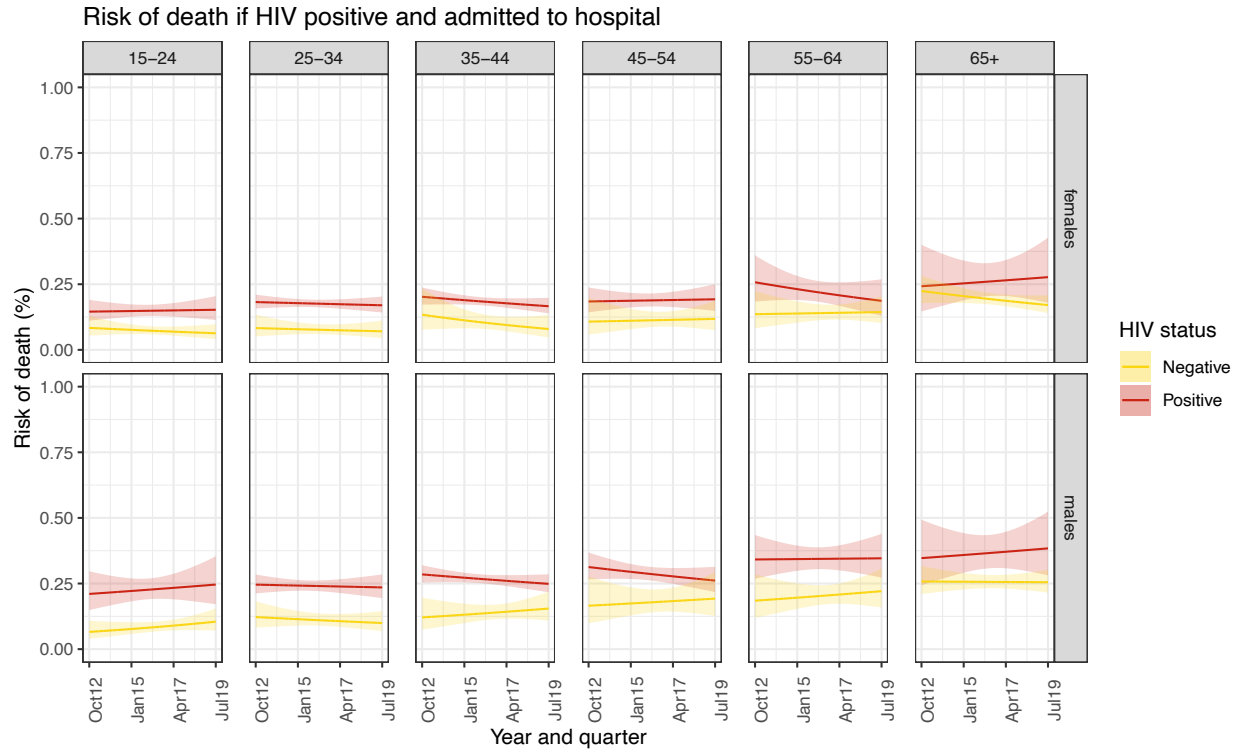

#### Supplementary table 4: Trend in outcome by age and sex

Using “emtrends” from “emmeans” package. In every age and sex group, confidence intervals for trend by quarter cross null effect.

| ageg10 | sex     | q.trend       | SE           | df  | asympt.LCL   | asympt.UCL   |
|--------|---------|---------------|--------------|-----|--------------|--------------|
| 15-24  | females | 0.0004729613  | 0.0011636125 | Inf | -0.001807677 | 2.753600e-03 |
| 25-34  | females | -0.0010007736 | 0.0008266785 | Inf | -0.002621034 | 6.194864e-04 |
| 35-44  | females | -0.0017293607 | 0.0009121361 | Inf | -0.003517115 | 5.839319e-05 |
| 45-54  | females | -0.0011786709 | 0.0013566146 | Inf | -0.003837587 | 1.480245e-03 |
| 55-64  | females | -0.0039595377 | 0.0020453824 | Inf | -0.007968414 | 4.933821e-05 |
| 65+    | females | 0.0008105217  | 0.0027584539 | Inf | -0.004595949 | 6.216992e-03 |
| 15-24  | males   | -0.0008936541 | 0.0016541745 | Inf | -0.004135777 | 2.348468e-03 |
| 25-34  | males   | -0.0012515457 | 0.0010450936 | Inf | -0.003299892 | 7.968002e-04 |
| 35-44  | males   | -0.0016206534 | 0.0009252838 | Inf | -0.003434176 | 1.928696e-04 |
| 45-54  | males   | -0.0010379190 | 0.0013394894 | Inf | -0.003663270 | 1.587432e-03 |
| 55-64  | males   | 0.0005027680  | 0.0020536922 | Inf | -0.003522395 | 4.527931e-03 |
| 65+    | males   | 0.0015549194  | 0.0026720492 | Inf | -0.003682201 | 6.792040e-03 |

## Information about people who resided outside Blantyre

5,511 people were excluded from analysis due to residence outside Blantyre. They had similar characteristics to people who lived in Blantyre.

HIV status of those inside and outside of Blantyre

| HIV               | Blantyre      | elsewhere    |
|-------------------|---------------|--------------|
| Unknown / Missing | 24.4% (7996)  | 25.3% (1392) |
| Negative          | 25.6% (8410)  | 36.2% (1996) |
| Positive          | 50.0% (16408) | 38.5% (2123) |

Age distribution of those inside and outside of Blantyre

| ageg10 | Blantyre     | elsewhere    |
|--------|--------------|--------------|
| 15-24  | 14.7% (4808) | 17.1% (942)  |
| 25-34  | 25.6% (8404) | 23.0% (1269) |
| 35-44  | 24.9% (8161) | 21.6% (1193) |
| 45-54  | 12.4% (4074) | 12.8% (704)  |
| 55-64  | 9.0% (2968)  | 9.9% (543)   |
| 65+    | 13.4% (4399) | 15.6% (860)  |

Sex distribution of those inside and outside of Blantyre

| sex     | Blantyre      | elsewhere    |
|---------|---------------|--------------|
| females | 50.6% (16618) | 53.9% (2971) |
| males   | 49.4% (16196) | 46.1% (2540) |

Outcomes of those inside and outside of Blantyre

| outcome                  | Blantyre      | elsewhere    |
|--------------------------|---------------|--------------|
| 1. Survived to discharge | 73.3% (24056) | 71.6% (3946) |
| 2. Died in hospital      | 18.5% (6071)  | 23.3% (1283) |
| 3. Missing / unknown     | 8.2% (2687)   | 5.1% (282)   |
